# Supplementary material for: Mapping wild boar density across Europe: combining spatial models and density estimates
Source: Research Square preprint supplement (doi:10.21203/rs.3.rs-7526029/v1), 2025-10-18
Supplement: Supplementary file 1 [file 0b54ffa2940d102d121c7e01.docx]

**Smith et al. Supplementary data.**

**Supplement 1.**

Table S1: Environmental variables used to model wild boar occurrence.

| **Code** | **Variable description** | **Code** | **Variable description** |
| --- | --- | --- | --- |
| BIO1 | Annual mean temperature | lc_10 | Cropland, rainfed |
| BIO2 | Mean diurnal range (mean monthly  max temp - min temp) | lc_11 | Herbaceous cover |
| BIO3 | Isothermality (BIO2/BIO7) (x100) | lc_12 | Tree or shrub cover |
| BIO4 | Temperature seasonality (SDx100) | lc_20 | Cropland, irrigated or post‐flooding |
| BIO5 | Max temperature of warmest month | lc_30 | Mosaic cropland (>50%) / natural vegetation (tree, shrub, herbaceous cover) (<50%) |
| BIO6 | Min temperature of coldest month | lc_40 | Mosaic natural vegetation (tree, shrub, herbaceous cover) (>50%) / cropland (<50%) |
| BIO7 | Temperature annual range (BIO5-BIO6) | lc_60 | Tree cover, broad-leaved, deciduous, closed to open (>15%) |
| BIO8 | Mean temperature of the wettest quarter | lc_61 | Tree cover, broad-leaved, deciduous, closed (>40%) |
| BIO9 | Mean temperature of the driest quarter | lc_70 | Tree cover, needle leaved, evergreen, closed to open (>15%) |
| BIO10 | Mean temperature of the warmest quarter | lc_71 | Tree cover, needle leaved, evergreen, closed (>40%) |
| BIO11 | Mean temperature of the coldest quarter | lc_80 | Tree cover, needle leaved, deciduous, closed to open (>15%) |
| BIO12 | Annual precipitation | lc_90 | Tree cover, mixed leaf type (broadleaved and needle leaved) |
| BIO13 | Precipitation of wettest month | lc_100 | Mosaic tree and shrub (>50%) / herbaceous cover (<50%) |
| BIO14 | Precipitation of driest month | lc_110 | Mosaic herbaceous cover (>50%) / tree and shrub (<50%) |
| BIO15 | Precipitation seasonality (coefficient of variation) | lc_120 | Shrubland |
| BIO16 | Precipitation of the wettest quarter | lc_122 | Deciduous shrubland |
| BIO17 | Precipitation of the driest quarter | lc_130 | Grassland |
| BIO18 | Precipitation of the warmest quarter | lc_140 | Lichens and mosses |
| BIO19 | Precipitation of the coldest quarter | lc_150 | Sparse vegetation (tree, shrub, herbaceous cover) (<15%) |
| GROW | Length of vegetation growing period | lc_152 | Sparse shrub (<15%) |
| SUNRAD | Sun radiation | lc_153 | Sparse herbaceous cover (<15%) |
| SNOW | Snow cover | lc_160 | Tree cover, flooded, fresh or brackish water |
| HFP | Human Footprint Index | lc_180 | Shrub or herbaceous cover, flooded, fresh/saline/brackish water |
| ALT | Mean altitude | lc_190 | Urban areas |
|  | | lc_200 | Bare areas |
| lc_201 | Consolidated bare areas |
| lc_202 | Unconsolidated bare areas |
| lc_210 | Water bodies |
| lc_220 | Permanent snow and ice |

Table S2: Wild boar densities obtained in the framework of the European Observatory of Wildlife (EOW), as well as some from recent literature (2015 onwards). Each site gives the country and site name, whether ASF was present when the density was estimated, which European bioregion it was in, the areas, longitude and latitude, and year of the estimate. The year, wild boar density estimate, standard error (SE) and coefficient of variation (CV) are given where calculated, along with the method used to estimate density.

|  | **Country** | **Study site** | **ASF present** | **Admin. area** | **Bioregion** | **Area (ha)** | **LONG** | **LAT** | **Year** | **Density (ind/**  **km2)** | **SE density** | **CV**  **(%)** | **Method** |
| --- | --- | --- | --- | --- | --- | --- | --- | --- | --- | --- | --- | --- | --- |
| 1 | Bulgaria | Voden-Iri Hisar | 0 | Hunting ground | Eastern | 8000 | 26.683 | 43.665 | 2022 | 4.38 | 1.84 | 42 | REM |
| 2 | Croatia | Senj | 0 | Hunting ground | Southern | 3548 | 14.916 | 45.012 | 2022 | 4.09 | 2.11 |  | REM |
| 3 | Czech Republic | The Bohemian Switzerland National Park | 0 | Protected Area | Eastern | 8000 | 14.381 | 50.876 | 2022 | 1.24 | 0.43 | 29 | REM |
| 4 | Italy | La Mandria | 0 | Protected Area | Western | 1604 | 7.570 | 45.158 | 2022 | 15.26 | 2.41 | 16 | REM |
| 5 | Italy | CACN1/Val Maira | 0 | Hunting ground | Western | 34851 | 8.538 | 45.665 | 2022 | 10.09 | 3.37 | 33 | REM |
| 6 | Italy | Alpe di Catenaia | 0 | Protected Area | Western | 2700 | 11.912 | 43.667 | 2022 | 25.83 | 6.97 | 27 | REM |
| 7 | Poland | Białowieża Forest | 1 | Hunting ground | Eastern | 2947 | 23.756 | 52.756 | 2022 | 0.42 | 0.26 | 61 | REM |
| 8 | Portugal | ZCA Santulhão | 0 | Hunting ground | Southern | 2998 | -6.641 | 41.573 | 2022 | 1.80 | 1.08 | 60 | REM |
| 9 | Portugal | Castreja | 0 | Hunting ground | Western | 2470 | -8.136 | 42.042 | 2022 | 6.39 | 2.65 | 41 | REM |
| 10 | Portugal | Lombada | 0 | Hunting ground | Southern | 21184 | -6.606 | 41.864 | 2022 | 2.79 | 1.12 | 40 | REM |
| 11 | Portugal | Murça | 0 | Hunting ground | Western | 6404 | -7.434 | 41.461 | 2022 | 2.07 | 0.77 | 37 | REM |
| 12 | Portugal | Castelo Melhor | 0 | Hunting ground | Southern | 3329 | -7.081 | 41.040 | 2022 | 1.95 | 0.74 | 38 | REM |
| 13 | Portugal | Cubeira | 0 | Hunting ground | Southern | 1812 | -7.219 | 39.677 | 2022 | 6.75 | 1.46 | 22 | REM |
| 14 | Portugal | Arrábida | 0 | Protected Area | Southern | 36283 | -9.029 | 38.518 | 2022 | 18.45 | 6.36 | 34 | REM |
| 15 | Portugal | Bicas da Serra | 0 | Hunting ground | Southern | 1129 | -7.932 | 37.199 | 2022 | 16.26 | 6.45 | 40 | REM |
| 16 | Portugal | Tolosa | 0 | Hunting ground | Southern | 4695 | -7.735 | 39.410 | 2022 | 2.92 | 0.86 | 30 | REM |
| 17 | Spain | Parque Natural Sierra del Carche | 0 | Protected Area | Southern | 5942 | -1.164 | 38.427 | 2022 | 0.85 | 0.26 |  | REM |
| 18 | Spain | Riofrio | 0 | Hunting ground | Southern | 2500 | -4.105 | 39.105 | 2022 | 4.88 | 1.9 | 39 | REM |
| 19 | Spain | Donana | 0 | Protected Area | Southern | 7000 | -6.464 | 36.959 | 2022 | 2.90 | 2.2 | 38 | REM |
| 20 | Spain | Arriola (Araba) | 0 | Hunting ground | Western | 4000 | -2.389 | 42.940 | 2022 | 4.27 | 0.76 | 18 | REM |
| 21 | Spain | Montgó (Alacant) | 0 | Protected Area | Southern | 2086 | 0.172 | 38.801 | 2022 | 14.47 | 9.59 | 66 | REM |
| 22 | Spain | Cabanes-Torreblanca (Castellón) | 0 | Protected Area | Southern | 850 | 0.188 | 40.175 | 2022 | 41.55 | 16.13 | 39 | REM |
| 23 | Spain | Serra Calderona Natural Park - Porta Coeli (Spain) | 0 | Protected Area | Southern | 2918 | -0.322 | 38.964 | 2022 | 14.49 | 5.57 | 39 | REM |
| 24 | Turkey | Kartdag Wildlife Reserve | 0 | Protected Area | Southern | 11495 | 33.341 | 41.782 | 2022 | 2.45 | 1.55 | 63 | REM |
| 25 | Andorra | Vedat de caça de la Vall de Ransol | 0 | Protected Area | Western | 2813 | 1.6441 | 42.6036 | 2022 | 0.19 | 0.14 | 70 | REM |
| 26 | Belgium | Marche-en-Famenne | 0 | Hunting ground | Western | 2500 | 5.365 | 50.252 | 2022 | 30.99 | 10.07 | 32 | REM |
| 27 | Belgium | Game Management UInit 7 | 0 | Hunting ground | Western | 10000 | 4.694 | 50.802 | 2022 | 8.60 | 2.93 | 34 | REM |
| 28 | Bosnia & Herzegovina | Romanija | 0 | Hunting ground | Eastern | 6000 | 18.486 | 43.562 | 2022 | 2.23 | 1.6 | 73 | REM |
| 29 | France | Marais Noir de Saint-Coulban | 0 | Protected Area | Western | 1500 | -1.911 | 48.566 | 2022 | 2.61 | 1.3 | 50 | REM |
| 30 | Georgia | Lagodekhi National Park | 0 | Protected Area | Eastern | 24450 | 46.315 | 41.876 | 2022 | 0.57 | 0.32 | 56 | REM |
| 31 | Hungary | Gemenc | 0 | Hunting ground | Eastern | 20000 | 18.873 | 46.217 | 2022 | 8.07 | 5.72 | 71 | REM |
| 32 | Israel | Ramat Hanadiv Nature Park | 0 | Protected Area | Southern | 1160 | 34.926 | 32.554 | 2022 | 20.88 | 9.1 | 44 | REM |
| 33 | Lithuania | MMMPV | 1 | Protected Area | Eastern | 5646 | 21.912 | 56.023 | 2022 | 0.52 | 1.42 | 35 | REM |
| 34 | Montenegro | Orjen Mountain | 0 | Hunting ground | Southern | 6000 | 18.551 | 42.620 | 2022 | 2.85 | 1.68 | 59 | REM |
| 35 | Netherlands | Veluwe | 0 | Hunting ground | Western | 2000 | 5.700 | 52.230 | 2022 | 2.05 | 1.02 | 50 | REM |
| 36 | Romania | Covasna | 1 | Hunting ground | Eastern | 6000 | 25.925 | 45.926 | 2022 | 0.62 | 0.43 |  | REM |
| 37 | Serbia | Studenica | 0 | Hunting ground | Eastern | 11000 | 20.263 | 43.332 | 2022 | 2.20 | 1.05 | 48 | REM |
| 38 | Slovakia | Javorie | 0 | Hunting ground | Eastern | 10000 | 19.140 | 48.534 | 2022 | 4.73 | 2.18 | 46 | REM |
| 39 | Slovenia | Vrhe Vrabče | 0 | Hunting ground | Eastern | 3950 | 13.943 | 45.777 | 2022 | 7.13 | 2.49 | 35 | REM |
| 40 | Slovenia | Rižana | 0 | Hunting ground | Eastern | 3657 | 13.854 | 45.538 | 2022 | 11.12 | 4.34 | 39 | REM |
| 41 | Sweden | Stalbo | 0 | Hunting ground | Eastern | 2500 | 17.125 | 60.017 | 2022 | 2.81 | 3.23 | 115 | REM |
| 42 | Poland | Gora Kalwaria | 0 | Hunting ground | Eastern | 4655 | 21.428 | 51.865 | 2021 | 7.66 | 4.63 | 60 | REM |
| 43 | Belarus | Naliboki Forest | 0 | Hunting ground | Eastern | 14100 | 26.597 | 53.981 | 2021 | 7.41 | 1.84 | 25 | REM |
| 44 | Germany | Alt Oerrel | 0 | Hunting ground | Western | 4130 | 10.201 | 52.961 | 2021 | 3.38 | 1.19 | 35 | REM |
| 45 | Germany | Süsing | 0 | Hunting ground | Western | 2720 | 10.334 | 53.089 | 2021 | 2.31 | 0.87 | 38 | REM |
| 46 | Czech Rep. | Niva | 0 | Hunting ground | Eastern | 2000 | 16.851 | 49.445 | 2021 | 17.09 | 7.42 | 43 | REM |
| 47 | Bulgaria | Voden-Iri Hisar | 0 | Hunting ground | Eastern | 8000 | 26.683 | 43.665 | 2021 | 2.35 | 0.86 | 37 | REM |
| 48 | Bulgaria | Panagyurishte | 0 | Hunting ground | Eastern | 2000 | 24.420 | 42.494 | 2021 | 2.51 | 1.67 | 67 | REM |
| 49 | Croatia | Biokovo | 0 | Hunting ground | Southern | 20000 | 17.052 | 43.328 | 2021 | 0.35 | 0.24 | 69 | REM |
| 50 | Croatia | Prolom | 0 | Hunting ground | Southern | 7700 | 16.099 | 45.253 | 2021 | 6.54 | 1.14 | 17 | REM |
| 51 | North Macedonia | Mrezicko | 0 | Hunting ground | Eastern | 2500 | 22.095 | 41.163 | 2021 | 37.23 | 10.74 | 29 | REM |
| 52 | Albania | Çajupi Mountain (Gjirokastra region) | 0 | Protected Area | Southern | 24447 | 20.146 | 42.046 | 2021 | 1.50 | 0.49 | 33 | REM |
| 53 | Turkey | Kartdag Wildlife Reserve | 0 | Protected Area | Southern | 11495 | 33.341 | 41.782 | 2021 | 5.75 | 2.4 | 42 | REM |
| 54 | Italy | La Mandria | 0 | Protected Area | Western | 1604 | 7.570 | 45.158 | 2021 | 15.25 | 2.41 | 16 | REM |
| 55 | Italy | 15. CACN3 | 0 | Hunting ground | Eastern | 73000 | 8.393 | 45.665 | 2021 | 5.84 | 2.12 | 36 | REM |
| 56 | Spain | Amurrio (Araba) | 0 | Hunting ground | Western | 6000 | -2.961 | 43.049 | 2021 | 2.12 | 0.83 | 39 | REM |
| 57 | Spain | Riglos (Huesca) | 0 | Hunting ground | Western | 2500 | -0.643 | 42.365 | 2021 | 11.31 | 4.11 | 36 | REM |
| 58 | Spain | Parque Natural Sierra del Carche | 0 | Protected Area | Southern | 2100 | -1.151 | 38.427 | 2021 | 4.08 | 1.63 | 40 | REM |
| 59 | Portugal | ZCA Santulhão | 0 | Hunting ground | Southern | 2998 | -6.641 | 41.573 | 2021 | 3.07 | 0.794 | 26 | REM |
| 60 | Spain | Navarra Eslava | 0 | Hunting ground | Southern | 3500 | -1.493 | 42.595 | 2018 | 2.37 | 3.55 |  | REM |
| 61 | Spain | Parc natural Serra de Mariola (ZCC Agres) | 0 | Hunting ground | Southern | 2450 | -0.499 | 38.760 | 2018 | 5.71 | 3.12 |  | REM |
| 62 | Spain | Valencia Ciuatretonda | 0 | Hunting ground | Southern | 4400 | -0.376 | 38.987 | 2018 | 13.99 | 19.8 |  | REM |
| 63 | Spain | Avila Becedas | 0 | Hunting ground | Southern | 2700 | -5.651 | 40.48 | 2018 | 3.24 | 1.7 |  | REM |
| 64 | Spain | Catalunya Montseny | 0 | Hunting ground | Southern | 1500 | 2.333 | 41.744 | 2018 | 9.50 | 8.31 |  | REM |
| 65 | Spain | Asturias Sueve | 0 | Hunting ground | Southern | 1800 | -5.229 | 42.452 | 2018 | 5.24 | 2.19 |  | REM |
| 66 | Spain | Quintos Mora | 0 | Hunting ground | Southern | 6600 | -4.111 | 39.368 | 2018 | 8.56 | 7.21 |  | REM |
| 67 | Spain | Parc natural de la Serra d'Irta | 0 | Protected Area | Southern | 2690 | 0.317 | 40.33 | 2022 | 4.33 | 3.21 | 74 | REM |
| 68 | Spain | Parc natural del Desert de les Palmes | 0 | Protected Area | Southern | 3096 | 0.038 | 40.089 | 2022 | 74.29 | 33.14 | 44 | REM |
| 69 | Spain | Parc natural Serra de Mariola (ZCC Agres) | 0 | Protected Area | Southern | 715 | -0.499 | 38.76 | 2022 | 4.87 | 2.8 | 58 | REM |
| 70 | Spain | Parc natural Font Roja (Refugi Fau) | 0 | Protected Area | Southern | 525 | -0.540 | 38.656 | 2022 | 5.90 | 3.07 | 52 | REM |
| 71 | Poland | Czarna Bialostocka Forest District | 1 | Hunting ground | Eastern | 6890 | 23.508 | 53.199 | 2021-2022 | 0.18 |  |  | UAV thermal |
| 72 | Portugal | Castro Laboreiro and Lamas de Mouro | 0 | Protected Area | Western | 3000 | -8.180 | 41.500 | 2015-2021 | 2.59 |  | 22 | DS-CT |
| 73 | Italy | Casentino | 0 | Hunting ground | Western | 15400 | 11.490 | 43.480 | 2013-2020 | 14.00 |  |  | CMR |
| 74 | Italy | Alpe della Luna | 0 | Protected Area | Western | 1540 | 12.166 | 43.651 | 2019 | 3.50 | 2 |  | Faecal counts |
| 75 | Italy | Berignone | 0 | Protected Area | Western | 2200 | 10.950 | 43.331 | 2019 | 12.5 | 3.6 |  | Faecal counts |
| 76 | Italy | Maremma National Park | 0 | Protected Area | Western | 8900 | 11.094 | 42.644 | 2019 | 10.5 | 1.9 |  | Faecal counts |
| 77 | Italy | Monte Penna | 0 | Protected Area | Western | 1050 | 11.690 | 42.775 | 2019 | 17.9 | 5.4 |  | Faecal counts |
| 78 | Italy | Monterufoli-Caselli | 0 | Protected Area | Western | 4830 | 10.783 | 43.255 | 2019 | 10.7 | 2.3 |  | Faecal counts |
| 79 | Italy | Sasso di Simone | 0 | Protected Area | Western | 1640 | 12.290 | 43.759 | 2019 | 16.00 | 5.7 |  | Faecal counts |
| 80 | Italy | Alta Murgia National Park | 0 | Protected Area | Southern | 66087 | 16.310 | 40.890 | 2019 | 43.00 |  |  | Drive Counts |
| 81 | Italy | Preserve of Castelporziano | 0 | Protected Area | Southern | 5990 | 12.404 | 41.695 | 2018 | 42.90 |  |  | DS |
| 82 | Czech Republic | Velký Hornek Natural Reserve | 0 | Hunting ground | Eastern | 1900 | 16.729 | 49.239 | 2018 | 11.20 | 2.89 | 38 | REM |
| 83 | Italy | Varzi | 0 | Hunting ground | Western | 2000 | 9.185 | 44.769 | 2022 | 6.53 |  |  | REM |

Table S3. Maxent variable importance in the occurrence model.

| **Variable** | **Percent contribution** | **Permutation importance** |
| --- | --- | --- |
| GROW | 16.3 | 13 |
| BIO18 | 9.6 | 12 |
| lc_60 | 8.9 | 7.3 |
| lc_11 | 7.4 | 4.6 |
| lc_10 | 6.4 | 7.9 |
| ALT | 5.5 | 5.8 |
| lc_120 | 4.8 | 2.7 |
| HFP | 4.5 | 7.5 |
| lc_210 | 3.8 | 2.8 |
| lc_40 | 3.4 | 3.6 |
| lc_150 | 3.3 | 3.6 |
| lc_90 | 2.9 | 3.1 |
| GPW | 2.7 | 5 |
| lc_30 | 2.7 | 3.5 |
| lc_200 | 2.5 | 3 |
| lc_20 | 2.5 | 1.8 |
| lc_100 | 2.4 | 3.8 |
| lc_12 | 2.3 | 0.8 |
| BIO19 | 2.3 | 2.1 |
| lc_130 | 2.3 | 3.6 |
| WIND | 1.8 | 0.6 |
| BIO15 | 1.5 | 0.8 |
| lc_180 | 0.3 | 0.9 |
